# Supplementary material for: A tetraphenylethylene-based covalent organic framework for waste gas adsorption and highly selective detection of Fe3+
Source: Royal Society of Chemistry journal article supplement (doi:10.1039/d1ce00870f), 2021-01-01
Supplement: d1ce00870f1.pdf [file d1ce00870f1.pdf]

## Supporting Information

### Tetraphenylethylene-based Covalent Organic Framework for Waste Gas

#### Adsorption and Highly Selective Detection of Fe<sup>3+</sup>

Di Cui,<sup>a,b</sup> Xuesong Ding,<sup>c</sup> Xie Wei,<sup>b</sup> Guangjuan Xu,<sup>b</sup> Zhongmin Su,<sup>\*a</sup> Yanhong Xu<sup>\*b</sup>  
and Yuzhong Xie<sup>\*a</sup>

<sup>a</sup> Department of Chemistry, Faculty of Science, Yanbian University, Yanji, Jilin, 133002, China.

<sup>b</sup> Key Laboratory of Preparation and Applications of Environmental Friendly Materials, Key Laboratory of Functional Materials Physics and Chemistry of the Ministry of Education (Jilin Normal University), Changchun, 130103, China.

<sup>c</sup> Key Laboratory of Nanosystem and Hierarchical Fabrication Center for Excellence in Nanoscience National Center for Nanoscience and Technology, Beijing, 100190, China.

**\*Corresponding Author:** Zhongmin Su, Yanhong Xu, Yuzhong Xie.

**Email:** zmsu@nenu.edu.cn, xuyh198@163.com, whyjs@ybu.edu.cn

## **Contents**

**Section A. Material and methods**

**Section B. TGA curves**

**Section C. SEM images**

**Section D. Heat of CO<sub>2</sub> adsorption**

**Section E. The Solid-UV spectra**

**Section F. Fluorescence emission spectra**

**Section G. Stern–Volmer plot curve**

**Section H. Selectivity and cyclicity**

**Section I. SEM and FTIR before and after recovery**

**Section J. Unit cell parameters and fractional atomic coordinates**

**Section K. Supporting references**

## Section A. Material and methods

**Chemicals and Materials:** 1,1,2,2-tetraphenylethene, bromine, 4-formylphenylboronic acid,  $K_2CO_3$ , NaOH, tetrabutyl ammonium chloride, 4,4'-Diaminodibenzophenone, Raney Nickel, and tetrakis(triphenylphosphine)palladium(0) were purchased from Aladdin and Energy chemical. All solvents used were purchased from Aladdin.

**Synthesis of Tetrakis(4-bromophenyl)ethylene (TBTPE)<sup>S1</sup>:** Powdered 1,1,2,2-tetraphenylethene (5.00 g, 15.0 mmol) was treated with bromine (7.50 mL, 0.15 mol) and the mixture was kept for 16 h at room temperature. The resulting solid was dissolved in hot toluene (120 mL), concentrated to about 20 mL, and the precipitate was isolated. Purification using flash chromatography on  $SiO_2$  (hexanes/ $CH_2Cl_2$ , 20:1 in vol.) gives TBTPE as a colorless solid (5.94 g) in 61% yield.  $^1H$  NMR ( $CDCl_3$ , 400 MHz):  $\delta$  (ppm) 7.26 (d, 8H), 6.85 (d, 8H).

**Synthesis of 4',4'',4''',4''''-(ethene-1,1,2,2-tetrayl)tetrakis([1,1'-biphenyl]-4-carbaldehyde) (TFBPE)<sup>S2</sup>:** TBTPE (684 mg, 1 mmol) and 4-formylphenylboronic acid (900 mg, 6 mmol) was dissolved in toluene (80 mL), and then an aqueous solution of  $K_2CO_3$  (1.66 g, 12 mmol) in water (15 mL) and tetrabutyl ammonium chloride (1 mL) were added. Then  $Pd(PPh_3)_4$  catalyst (10 mg) was added and the reaction mixture was stirred at 85 °C for 1 d. After cooling to room temperature, the reaction mixture was mixed with water and the organic layer was precipitated by  $CH_3OH$  to get crude product. Recrystallization with  $CHCl_3$  and diethyl ether to obtain yellowish green solid (535 mg, 71%).  $^1H$  NMR ( $DMSO-d_6$  400 Hz):  $\delta$  (ppm) 10.03 (s, 4H), 7.96 (d, 8H), 7.90 (d, 8H), 7.69 (d, 8H), 7.24 (d,8H).

**Synthesis of 1,1,2,2-Tetrakis(4-aminophenyl)ethene (TAPE)<sup>S3</sup>:** Weigh 4,4'-

Diaminodibenzophenone (0.3 g, 1.41 mmol) and Raney Nickel (0.4 g, 3.37 mmol), slowly add the mixture of 48% HBr (10 mL) and concentrated HCl (10 mL) to the mixture, and stir at 100 °C for 5 hours. Once the reaction is complete, cool to room temperature, add 100 ml saturated NaOH solution, and stir for 1 hour. The solid sediment was collected and the title compound (0.23 g, 0.60 mmol, 85 %) as a yellow powder. <sup>1</sup>H NMR (DMSO-d<sub>6</sub> 400 Hz): δ (ppm) 6.57 (d, 8 H), 6.26 (d, 8H), 4.85 (s, 8H).

**Synthesis of TTPE-COF:** A 10 mL pyrex tube is charged with TAPE (9.8 mg, 25 μmol), TFBPE (18.7 mg, 25 μmol), 3 mL of anhydrous toluene / anhydrous acetonitrile (v/v=3:2), and 0.2 mL of 6 M aqueous acetic acid. This mixture was sonicated for 20 minutes to get a homogenous dispersion. The tube was then flash frozen at 77 K (liquid N<sub>2</sub> bath) and degassed by three freeze-pump-thaw cycles. The tube was sealed off and then heated at 120 °C for 5 days. The precipitation was collected by centrifugation, washed repeatedly with anhydrous acetone and then dried at 120 °C under vacuum for 12 hours to give a yellow powder (21 mg, 76%).

**Material Characterization:** Fourier transforms Infrared (FT-IR) spectra were recorded on a Perkin-Elmer model FT-IR-frontier infrared spectrometer. For all FT-IR tests, a small amount of sample can be directly mixed with potassium bromide and ground into a powder, compressed, and the pressed product can be directly tested. UV-Vis-IR diffuse reflectance spectra (Kubelka-Munk spectrum) were recorded on a JASCO model V-770 spectrometer equipped with integration sphere model ISN-923. For the UV test, the blank sample test is first carried out with whiteboard as the background, and then the holder with the sample was installed on the window of the integrating sphere. Photoluminescence spectra were recorded on JASCO model FP-8600 spectrofluorometer.

The absolute quantum yield was determined by standard procedure with an integral sphere JASCO model ISF-834 mounted on the FP-8600 spectrofluorometer. Time-resolved fluorescence spectroscopy of solid samples was recorded on Hamamatsu compact fluorescence lifetime spectrometer Quantaaurus–Tau model C11367-11. Solid-state  $^{13}\text{C}$  cross-polarization/magic angle spinning nuclear magnetic resonance (CP/MAS NMR) analysis was conducted using a AVANCEIII/WB-400. Elemental analysis (C, H, and N) was performed on a Euro Vector EA3000 elemental analyzer. Field-emission scanning electron microscopy (FE-SEM) images were performed on a JEOL model JSM-6700 operating at an accelerating voltage of 5.0 kV. Transmission electron microscopy (TEM) was performed using a JEOL JEM 2100 with an acceleration voltage of 300 kV. Powder X-ray diffraction (PXRD) data were recorded on a Rigaku model RINT Ultima III diffractometer by depositing powder on glass substrate, from  $2\theta = 2.5^\circ$  up to  $40^\circ$  with  $0.02^\circ$  increment. TGA analysis was carried out by using a Q5000IR analyzer (TA Instruments) with an automated vertical overhead thermobalance. Before measurement, the samples were heated at a rate of  $5^\circ\text{C min}^{-1}$  under a nitrogen atmosphere. Nitrogen sorption isotherms were measured at 77 K with Bel Japan Inc. model BELSORP-max analyzer. Before measurement, the samples were degassed in vacuum at  $120^\circ\text{C}$  for more than 10 h. The Brunauer-Emmett-Teller (BET) method was utilized to calculate the specific surface areas and pore volume. The nonlocal density functional theory (NLDFT) method was applied for the estimation of pore size and pore size distribution. Water, benzene and toluene vapor sorption isotherms were collected at  $20^\circ\text{C}$  (293K) from Bel Japan Inc. model BELSORP-max analyzer. All the samples were degassed at  $120^\circ\text{C}$  for 10 h before being subject to vapor sorption measurements. Carbon dioxide sorption isotherms were measured at 318 K and 45 bar with an iSorbHP2 analyzer. Before

measurement, the samples were also degassed in vacuum at 120 °C for more than 10 h.

**Fluorescence detection:** In a typical experimental setup, 3 mg of TTPE-COF was added into the cuvette containing 3 mL of ethanol, and then sonicated to form homo-disperse suspension (1 mg mL<sup>-1</sup>). Take 0.75 mL of TTPE-COF suspension and add different nitrate (M = Na<sup>+</sup>, K<sup>+</sup>, Al<sup>3+</sup>, Cr<sup>3+</sup>, Cu<sup>2+</sup>, Hg<sup>+</sup>, Hg<sup>2+</sup>, Bi<sup>3+</sup>, Fe<sup>3+</sup>, 10<sup>-2</sup> mol L<sup>-1</sup>) ethanol solutions to 3 mL. After ten minutes of ultrasonic treatment, the mixed suspension was obtained for fluorescence detection. Will TTPE-COF (3 mg) is added to the 3 ml of different organic solvents, such as Dioxane, H<sub>2</sub>O, N,N-Dimethylformamide (DMF), Ethyl acetate (EAC). TTPE-COF solvent suspension was prepared after 10 minutes of ultrasonic treatment for fluorescence detection. The dispersible nature of TTPE-COF will facilitate vicinal contact between the probe and nitro explosive analytes. All the experiments were performed in triplicate and consistent results were reported.

The fluorescence quenching was analyzed using the Stern-Volmer equations:<sup>S4</sup>

$$I_0/I = 1 + K_{sv} [Q]$$

where I<sub>0</sub> and I are the fluorescence intensity, in the absence and presence of the analyte, respectively, K<sub>sv</sub> is the Stern-Volmer quenching constant and [Q] is the concentration of analyte.

The quenching percentage was calculated using the equation as follows:

$$\text{Fluorescence quenching \%} = (1 - I/I_0) \times 100 \%$$

where I<sub>0</sub> is the initial fluorescence intensity in the absence of metal ions, I is the fluorescence intensity in the presence of the corresponding analyte.

The limit of detection concentration (LOD) was calculated according to the formula:<sup>S5</sup>

$$\text{LOD} = 3\delta / K_{sv}$$

and  $\delta$  is the standard deviation of the detection method.

**Regeneration tests:** Fluorescence spectra were recorded after the addition of solution contains  $\text{Fe}^{3+}$  ion. After the fluorescence test, the  $\text{Fe}^{3+}$  ion was removed by centrifuging 5 min, washing with EtOH three times. The re-generate TTPE-COF suspension was obtained after 3 mL EtOH was added to the precipitant. Fluorescence spectra have recorded the performance of the regenerate TTPE-COF.

**Variable temperature fluorescence spectrum:** The sample was tested on JASCO model FP-8600 fluorescence spectrometer. The high-temperature fluorescent controller (HPC-836) is used to adjust the ambient temperature. The temperature was controlled within the range of 303 K-573 K. The temperature was raised once every 30°C and kept for 2 minutes. The measurement was made after the temperature was stable.

Section B. TGA curves

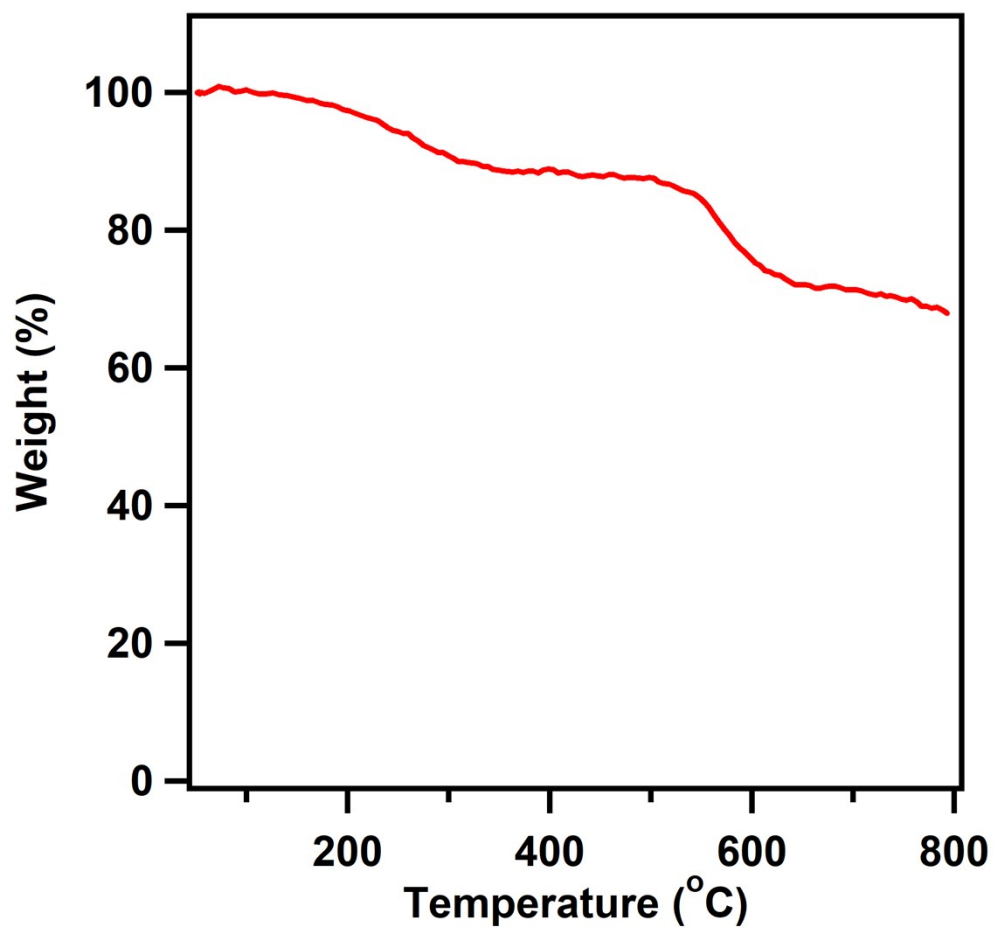

Fig. S1 TGA curve of TTPE-COF.



Section C. SEM images

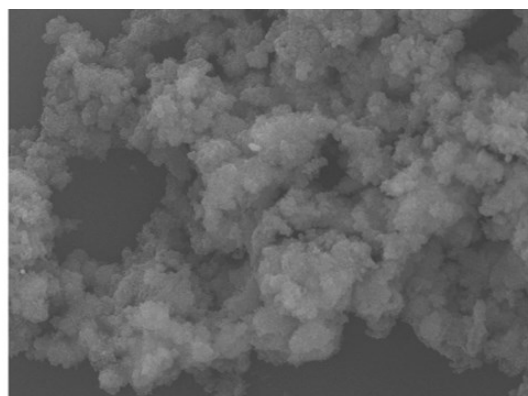

TTPE-COF

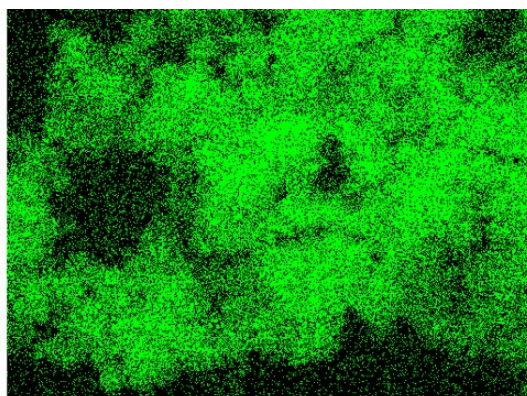

C Ka1\_2

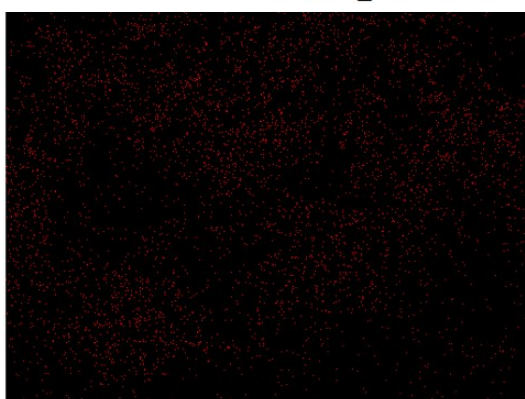

N Ka1\_2

**Fig. S2** Energy dispersive spectrometer of TTPE-COF.

Section D. Heat of CO<sub>2</sub> adsorption

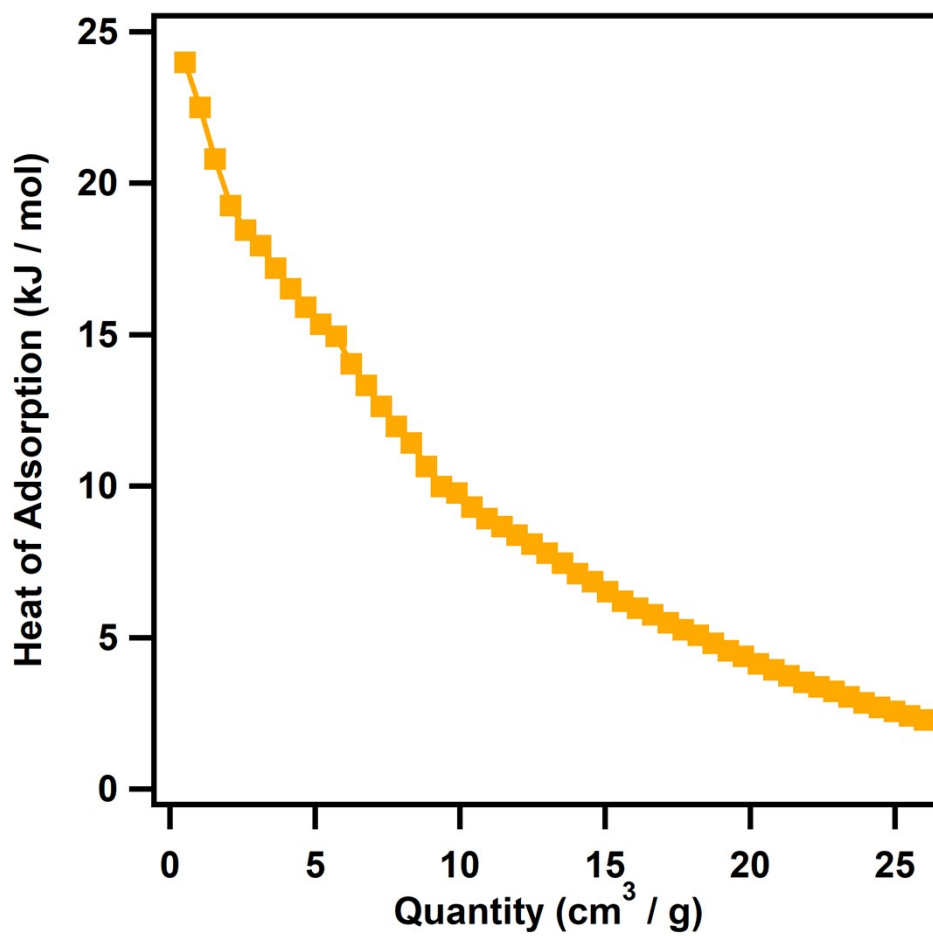

Fig. S3 The isosteric heats of CO<sub>2</sub> adsorption for TTPE-COF.

Section E. The Solid-UV spectra

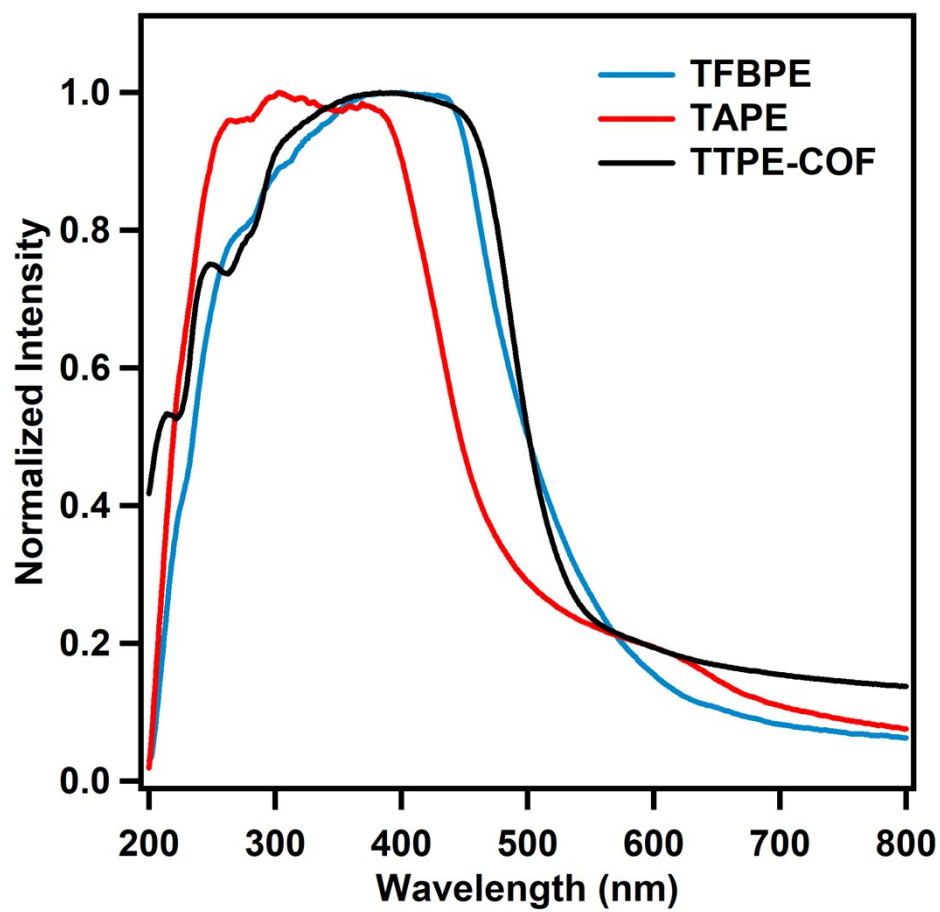

Fig.S4 Solid state UV spectra of TFBPE, TAPE and TTPE-COF.

Section F. Fluorescence emission spectra

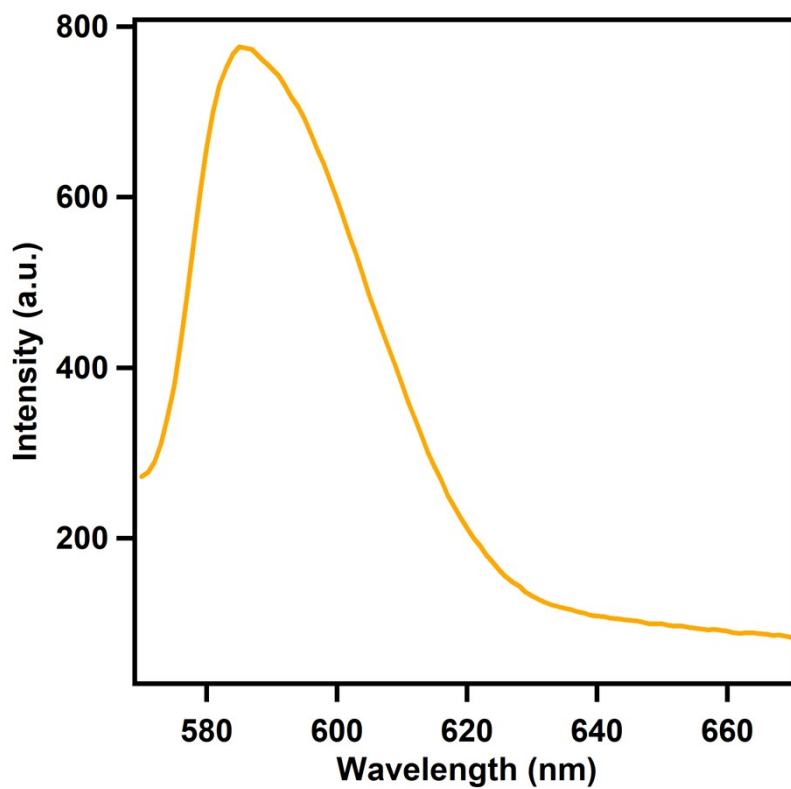

Fig. S5 The solid-state fluorescence spectra of the TTPE-COF.

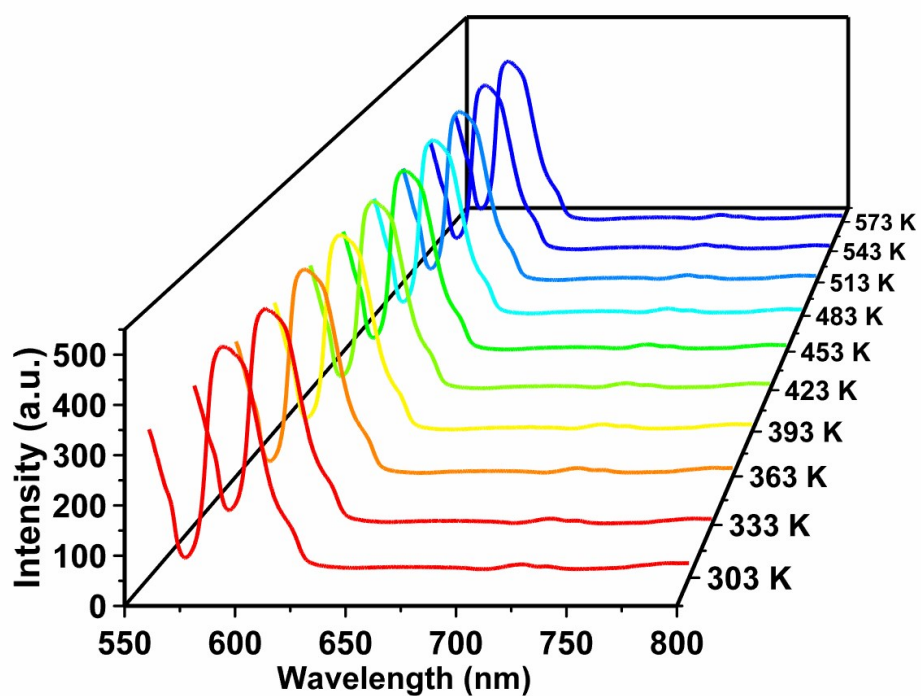

Fig. S6 Variable temperature fluorescence spectra of TTPE-COF.

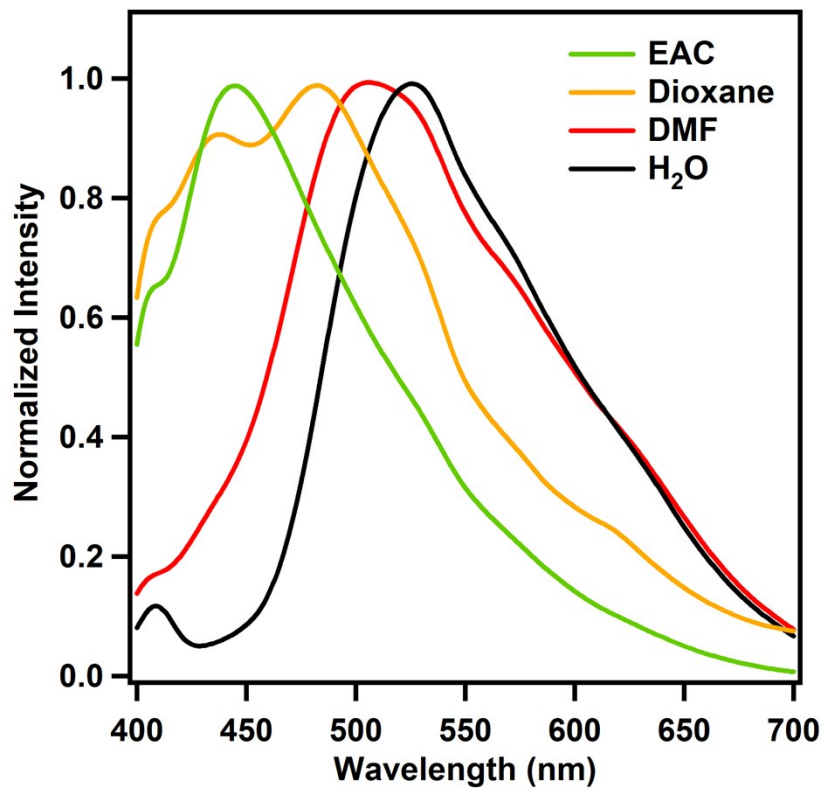

Fig. S7 Fluorescence spectra of TTPE-COF in solvents with different polarities.

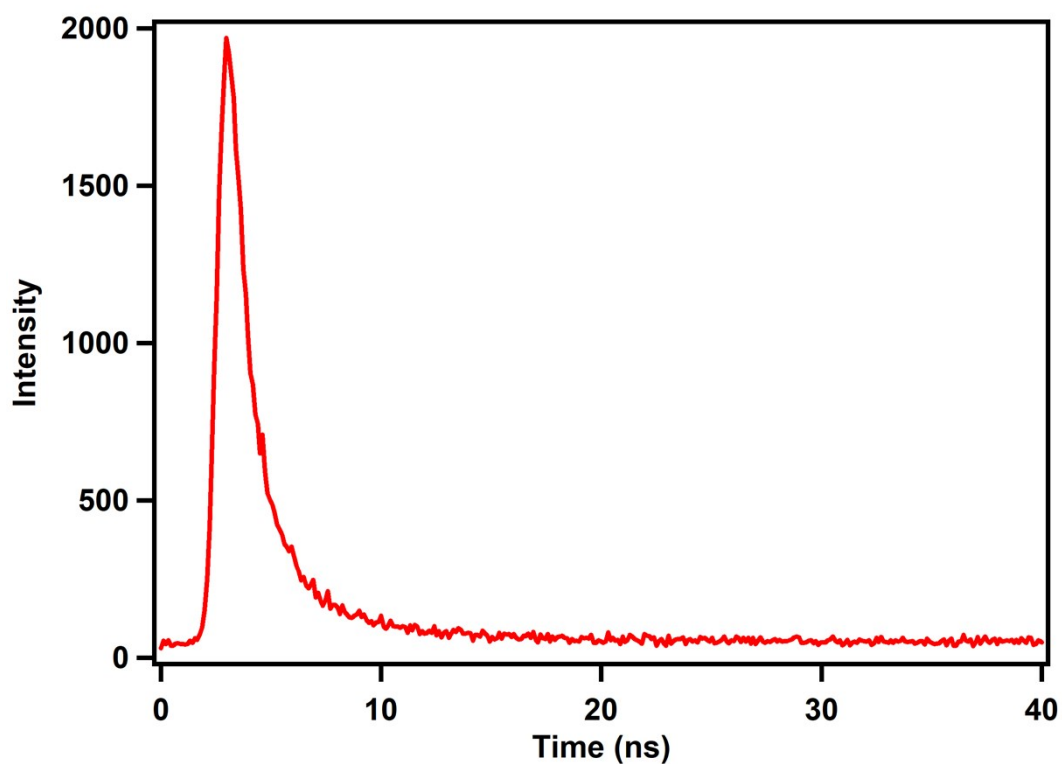

Fig. S8 Time-resolved fluorescence decay profiles of TTPE-COF.

Section G. Stern–Volmer plot curve

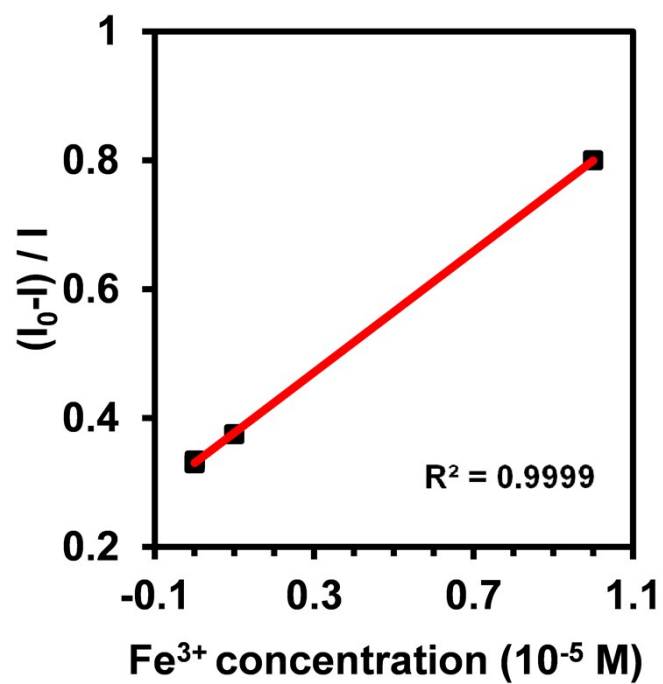

Fig. S9 Stern–Volmer plot curve ( $10^{-8}$ - $10^{-5}$  M).

## Section H. Selectivity and cyclicity

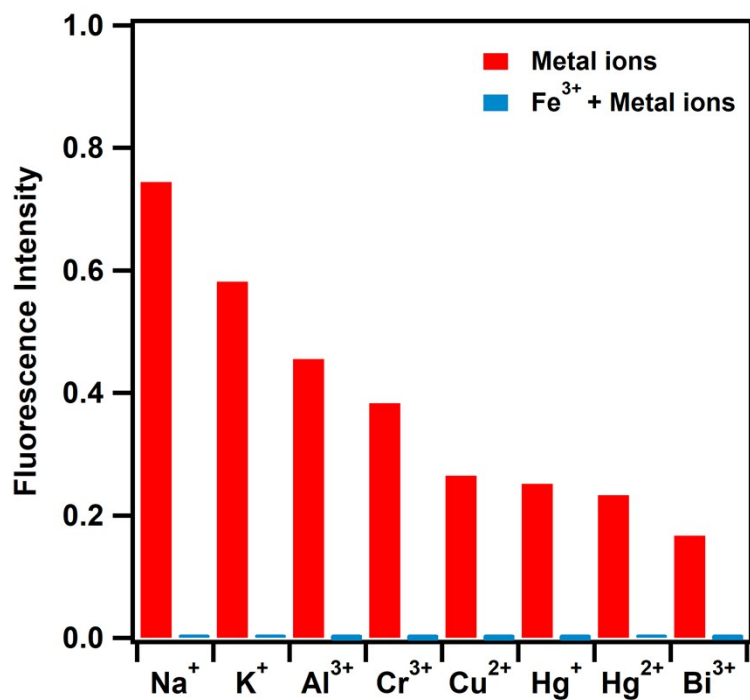

Fig. S10 The PL intensities of TTPE-COF before and after addition of Fe<sup>3+</sup> in the presence of various metal ions.

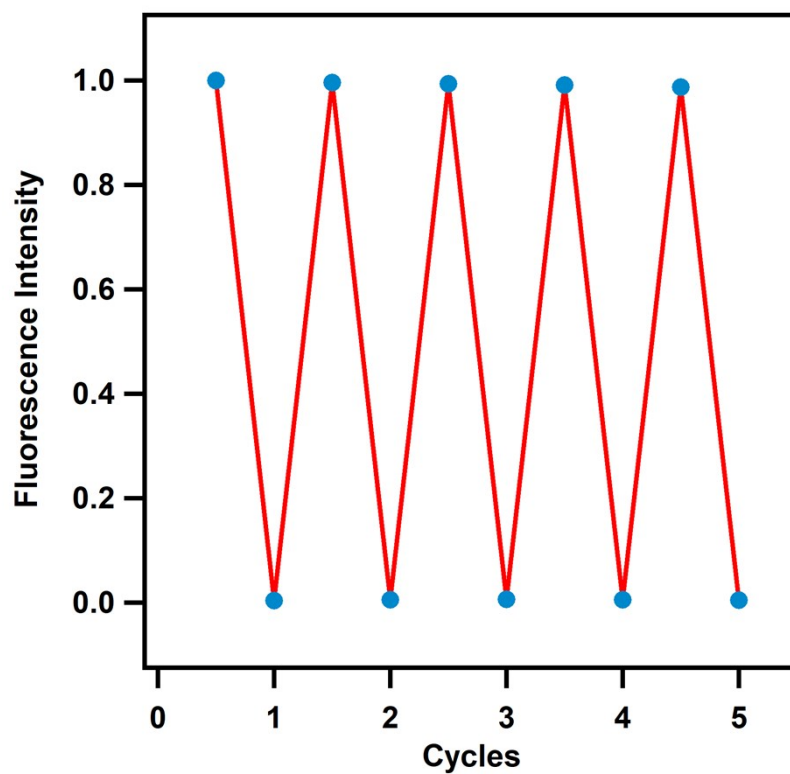

Fig. S11 Quenching and recovery tests of TTPE-COF for Fe<sup>3+</sup>.

Section I. SEM and FTIR before and after recovery

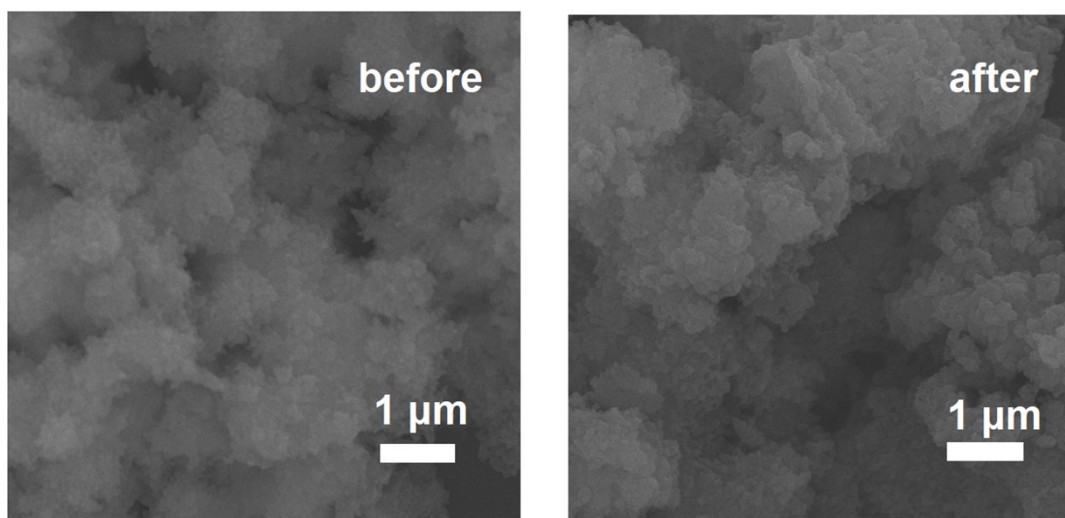

Fig. S12 SEM of TTPE-COF before and after recovery.

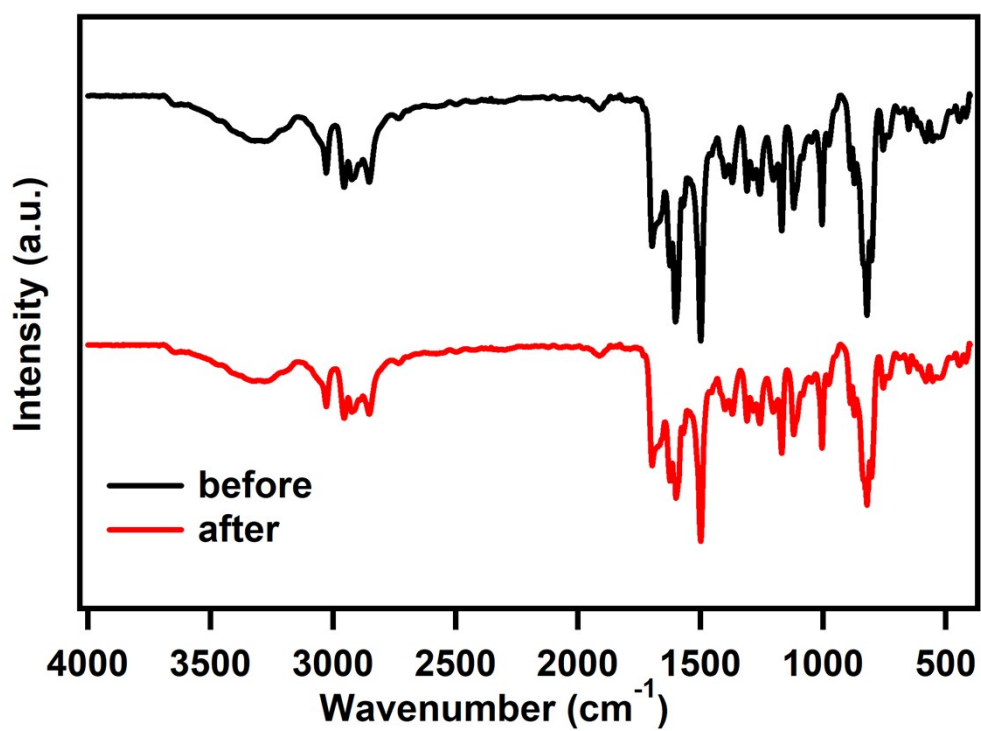

Fig. S13 FTIR of TTPE-COF before and after recovery.



## Section J. Unit cell parameters and fractional atomic coordinates

**Table S1.** Unit cell parameters and fractional atomic coordinates for TTPE-COF.

| Space group          |         | <i>P1</i>                                                                                                           |          |
|----------------------|---------|---------------------------------------------------------------------------------------------------------------------|----------|
| Calculated unit cell |         | $a = 34.67 \text{ \AA}, b = 34.69 \text{ \AA}, c = 5.33 \text{ \AA}; \alpha = 69^\circ, \beta = \gamma = 110^\circ$ |          |
| Pawley refinement    |         | $R_{wp} = 4.88\%, R_p = 3.78\%$                                                                                     |          |
| atoms                | x       | y                                                                                                                   | z        |
| C1                   | 7.31408 | 0.13695                                                                                                             | -0.12106 |
| C2                   | 7.8742  | 0.06411                                                                                                             | -0.06115 |
| C3                   | 7.12927 | 0.31112                                                                                                             | 0.10555  |
| C4                   | 7.54939 | 0.37358                                                                                                             | -0.00856 |
| C5                   | 7.8119  | 0.63292                                                                                                             | 0.0821   |
| C6                   | 7.36827 | 0.55174                                                                                                             | 0.01748  |
| C7                   | 7.62876 | 0.81449                                                                                                             | -0.06684 |
| C8                   | 7.06055 | 0.87805                                                                                                             | 0.07996  |
| N9                   | 7.84987 | 0.02643                                                                                                             | 0.01655  |
| N10                  | 7.33557 | 0.15863                                                                                                             | 0.06349  |
| N11                  | 7.51243 | 0.34601                                                                                                             | -0.04617 |
| N12                  | 7.84308 | 0.6657                                                                                                              | 0.13482  |
| N13                  | 7.15737 | 0.33816                                                                                                             | -0.02523 |
| N14                  | 7.02271 | 0.85405                                                                                                             | -0.00067 |
| N15                  | 7.34093 | 0.51472                                                                                                             | 0.05759  |
| N16                  | 7.66137 | 0.84579                                                                                                             | -0.12017 |
| C17                  | 7.90651 | 0.84385                                                                                                             | -0.17936 |
| C18                  | 7.94581 | 0.84                                                                                                                | -0.16982 |
| C19                  | 7.98339 | 0.85856                                                                                                             | 0.00287  |
| C20                  | 7.98132 | 0.8801                                                                                                              | 0.17559  |
| C21                  | 7.94191 | 0.88305                                                                                                             | 0.17197  |

|     |         |         |          |
|-----|---------|---------|----------|
| C22 | 7.8005  | 0.76169 | -0.11916 |
| C23 | 7.80386 | 0.72141 | -0.09114 |
| C24 | 7.83741 | 0.70586 | 0.11198  |
| C25 | 7.86719 | 0.73098 | 0.28654  |
| C26 | 7.86363 | 0.77126 | 0.25956  |
| C27 | 7.8788  | 0.94574 | -0.15776 |
| C28 | 7.8758  | 0.98506 | -0.16064 |
| C29 | 7.85427 | 0.98713 | 0.01193  |
| C30 | 7.83565 | 0.94959 | 0.18334  |
| C31 | 7.83956 | 0.91037 | 0.19214  |
| C32 | 7.85987 | 0.90786 | 0.01392  |
| C33 | 7.90398 | 0.86409 | -0.00062 |
| C34 | 7.83105 | 0.78764 | 0.04941  |
| C35 | 7.86205 | 0.86602 | 0.00667  |
| C36 | 7.82741 | 0.83125 | 0.00665  |
| C37 | 7.72651 | 0.87013 | -0.2732  |
| C38 | 7.70165 | 0.8404  | -0.09786 |
| C39 | 7.71759 | 0.80719 | 0.10573  |
| C40 | 7.75799 | 0.8041  | 0.13343  |
| C41 | 7.78367 | 0.83459 | -0.03598 |
| C42 | 7.76693 | 0.86685 | -0.24653 |
| C43 | 7.82149 | 0.13533 | 0.03186  |
| C44 | 7.82897 | 0.0991  | 0.01916  |
| C45 | 7.86611 | 0.10199 | -0.04398 |
| C46 | 7.89591 | 0.14157 | -0.09067 |
| C47 | 7.88881 | 0.17771 | -0.07362 |
| C48 | 7.65989 | 0.39145 | -0.07554 |
| C49 | 7.6237  | 0.39895 | -0.06064 |
| C50 | 7.58735 | 0.36525 | -0.0249  |

|     |         |         |          |
|-----|---------|---------|----------|
| C51 | 7.5879  | 0.32386 | -0.00255 |
| C52 | 7.62443 | 0.31622 | -0.01105 |
| C53 | 7.86758 | 0.55647 | 0.08347  |
| C54 | 7.86084 | 0.59331 | 0.09313  |
| C55 | 7.82019 | 0.59381 | 0.08703  |
| C56 | 7.78653 | 0.55687 | 0.07405  |
| C57 | 7.79334 | 0.51994 | 0.06717  |
| C58 | 7.8513  | 0.17514 | -0.01459 |
| C59 | 7.66061 | 0.34998 | -0.04845 |
| C60 | 7.83385 | 0.5195  | 0.07012  |
| C61 | 7.92222 | 0.3384  | 0.29881  |
| C62 | 7.96137 | 0.33298 | 0.31791  |
| C63 | 7.97944 | 0.35124 | 0.09095  |
| C64 | 7.95831 | 0.37669 | -0.14986 |
| C65 | 7.91905 | 0.38179 | -0.16874 |
| C66 | 7.81212 | 0.2489  | 0.16942  |
| C67 | 7.82051 | 0.21222 | 0.1707   |
| C68 | 7.84278 | 0.214   | -0.0099  |
| C69 | 7.85587 | 0.25319 | -0.1931  |
| C70 | 7.84713 | 0.28962 | -0.19536 |
| C71 | 7.86983 | 0.44443 | -0.11931 |
| C72 | 7.86394 | 0.48183 | -0.11162 |
| C73 | 7.84087 | 0.48032 | 0.0627   |
| C74 | 7.82468 | 0.44106 | 0.23297  |
| C75 | 7.83131 | 0.40391 | 0.22899  |
| C76 | 7.85237 | 0.40467 | 0.04466  |
| C77 | 7.90025 | 0.36229 | 0.05447  |
| C78 | 7.8269  | 0.28854 | -0.00591 |
| C79 | 7.85649 | 0.36415 | 0.02782  |

|      |         |         |          |
|------|---------|---------|----------|
| C80  | 7.82222 | 0.32892 | 0.00955  |
| C81  | 7.71849 | 0.36229 | -0.26791 |
| C82  | 7.69986 | 0.34174 | -0.04495 |
| C83  | 7.72002 | 0.31472 | 0.18898  |
| C84  | 7.75917 | 0.30972 | 0.20502  |
| C85  | 7.77841 | 0.33063 | -0.01616 |
| C86  | 7.75717 | 0.35636 | -0.25434 |
| C87  | 7.37052 | 0.05059 | 0.07141  |
| C88  | 7.36162 | 0.08723 | 0.06756  |
| C89  | 7.32388 | 0.09798 | -0.10731 |
| C90  | 7.29507 | 0.07135 | -0.27616 |
| C91  | 7.30333 | 0.03419 | -0.26729 |
| C92  | 7.34131 | 0.02324 | -0.09452 |
| C93  | 7.0253  | 0.30101 | 0.23446  |
| C94  | 7.06128 | 0.29142 | 0.23522  |
| C95  | 7.09136 | 0.3222  | 0.09879  |
| C96  | 7.08492 | 0.36295 | -0.03764 |
| C97  | 7.04901 | 0.37271 | -0.0369  |
| C98  | 7.01869 | 0.3418  | 0.09902  |
| C99  | 7.51576 | 0.79528 | -0.04884 |
| C100 | 7.55275 | 0.78872 | -0.05698 |
| C101 | 7.58957 | 0.8225  | -0.07044 |
| C102 | 7.5889  | 0.86302 | -0.07558 |
| C103 | 7.55202 | 0.8695  | -0.06464 |
| C104 | 7.3108  | 0.6266  | 0.02118  |
| C105 | 7.31845 | 0.59011 | 0.01227  |
| C106 | 7.35986 | 0.58967 | 0.0333   |
| C107 | 7.39357 | 0.6261  | 0.06787  |
| C108 | 7.38606 | 0.66223 | 0.08328  |

|      |         |         |          |
|------|---------|---------|----------|
| C109 | 7.17409 | 0.89198 | 0.09293  |
| C110 | 7.1381  | 0.89926 | 0.11099  |
| C111 | 7.0983  | 0.86975 | 0.06255  |
| C112 | 7.09505 | 0.83269 | -0.00309 |
| C113 | 7.13112 | 0.82502 | -0.01674 |
| C114 | 7.34458 | 0.66283 | 0.05778  |
| C115 | 7.51516 | 0.83566 | -0.05095 |
| C116 | 7.17113 | 0.85457 | 0.03117  |
| C117 | 7.39619 | 0.33417 | -0.19161 |
| C118 | 7.43508 | 0.33081 | -0.19459 |
| C119 | 7.47353 | 0.35051 | -0.03431 |
| C120 | 7.47283 | 0.37269 | 0.13908  |
| C121 | 7.43386 | 0.37479 | 0.15071  |
| C122 | 7.28845 | 0.25    | -0.09961 |
| C123 | 7.29191 | 0.21079 | -0.09484 |
| C124 | 7.32876 | 0.19702 | 0.06792  |
| C125 | 7.36006 | 0.22156 | 0.24162  |
| C126 | 7.35646 | 0.26083 | 0.23693  |
| C127 | 7.37057 | 0.43609 | -0.13349 |
| C128 | 7.36773 | 0.475   | -0.12613 |
| C129 | 7.34578 | 0.47586 | 0.04797  |
| C130 | 7.32702 | 0.43761 | 0.21318  |
| C131 | 7.33129 | 0.39889 | 0.21482  |
| C132 | 7.35148 | 0.39735 | 0.03194  |
| C133 | 7.39493 | 0.35471 | -0.00965 |
| C134 | 7.3218  | 0.27679 | 0.05247  |
| C135 | 7.35345 | 0.35575 | 0.01439  |
| C136 | 7.31891 | 0.32057 | 0.01995  |
| C137 | 7.21762 | 0.35831 | -0.22319 |

|      |         |         |          |
|------|---------|---------|----------|
| C138 | 7.19616 | 0.33118 | -0.02166 |
| C139 | 7.21426 | 0.29933 | 0.18396  |
| C140 | 7.25322 | 0.29534 | 0.18787  |
| C141 | 7.27573 | 0.32378 | -0.00512 |
| C142 | 7.2569  | 0.35448 | -0.21724 |
| C143 | 7.39935 | 0.83283 | -0.21081 |
| C144 | 7.43656 | 0.82621 | -0.21411 |
| C145 | 7.47589 | 0.84245 | -0.04305 |
| C146 | 7.47741 | 0.86548 | 0.13187  |
| C147 | 7.43995 | 0.87135 | 0.13889  |
| C148 | 7.30442 | 0.76129 | -0.19241 |
| C149 | 7.30928 | 0.72217 | -0.17772 |
| C150 | 7.33637 | 0.70197 | 0.05578  |
| C151 | 7.35711 | 0.72052 | 0.2797   |
| C152 | 7.35135 | 0.75918 | 0.26743  |
| C153 | 7.37737 | 0.92085 | 0.18596  |
| C154 | 7.37323 | 0.96061 | 0.16476  |
| C155 | 7.34937 | 0.98277 | -0.0809  |
| C156 | 7.33162 | 0.96471 | -0.30891 |
| C157 | 7.33562 | 0.9248  | -0.28607 |
| C158 | 7.35814 | 0.90219 | -0.03829 |
| C159 | 7.40014 | 0.85394 | -0.02647 |
| C160 | 7.32558 | 0.78048 | 0.02962  |
| C161 | 7.35963 | 0.85834 | -0.01153 |
| C162 | 7.32419 | 0.82432 | 0.00494  |
| C163 | 7.2492  | 0.85857 | 0.20954  |
| C164 | 7.20981 | 0.84582 | 0.02537  |
| C165 | 7.20764 | 0.82359 | -0.15691 |
| C166 | 7.24414 | 0.81489 | -0.15617 |

|      |         |         |          |
|------|---------|---------|----------|
| C167 | 7.28397 | 0.82932 | 0.02028  |
| C168 | 7.28542 | 0.84946 | 0.21136  |
| H169 | 7.28875 | 0.14721 | -0.29306 |
| H170 | 7.90172 | 0.06825 | -0.12915 |
| H171 | 7.1327  | 0.2795  | 0.2211   |
| H172 | 7.5525  | 0.40387 | 0.02277  |
| H173 | 7.7791  | 0.63377 | 0.03421  |
| H174 | 7.39854 | 0.55492 | -0.0146  |
| H175 | 7.62984 | 0.78181 | -0.01907 |
| H176 | 7.0649  | 0.90541 | 0.1503   |
| H177 | 7.87799 | 0.83036 | -0.32206 |
| H178 | 7.94754 | 0.82311 | -0.3003  |
| H179 | 8.00972 | 0.89352 | 0.31863  |
| H180 | 7.94087 | 0.89945 | 0.30839  |
| H181 | 7.77406 | 0.77291 | -0.27302 |
| H182 | 7.78097 | 0.70291 | -0.23234 |
| H183 | 7.89299 | 0.71902 | 0.44402  |
| H184 | 7.88661 | 0.78989 | 0.39916  |
| H185 | 7.89524 | 0.94473 | -0.29388 |
| H186 | 7.88922 | 1.01342 | -0.30293 |
| H187 | 7.81874 | 0.95128 | 0.31369  |
| H188 | 7.82609 | 0.8819  | 0.33422  |
| H189 | 7.71425 | 0.89567 | -0.43097 |
| H190 | 7.69931 | 0.78437 | 0.24758  |
| H191 | 7.76954 | 0.77793 | 0.28774  |
| H192 | 7.78537 | 0.88979 | -0.38659 |
| H193 | 7.79195 | 0.13225 | 0.07269  |
| H194 | 7.80553 | 0.06878 | 0.05559  |
| H195 | 7.92484 | 0.14445 | -0.13865 |

|      |         |         |          |
|------|---------|---------|----------|
| H196 | 7.91286 | 0.20764 | -0.10505 |
| H197 | 7.68778 | 0.41776 | -0.10131 |
| H198 | 7.62398 | 0.43108 | -0.07792 |
| H199 | 7.5602  | 0.29743 | 0.02558  |
| H200 | 7.62453 | 0.28404 | 0.01052  |
| H201 | 7.89916 | 0.55667 | 0.08889  |
| H202 | 7.88712 | 0.62166 | 0.10126  |
| H203 | 7.75493 | 0.55667 | 0.06837  |
| H204 | 7.76682 | 0.49184 | 0.05488  |
| H205 | 7.90885 | 0.32353 | 0.47424  |
| H206 | 7.97742 | 0.3143  | 0.51009  |
| H207 | 7.97101 | 0.39091 | -0.32969 |
| H208 | 7.9025  | 0.39906 | -0.36379 |
| H209 | 7.7954  | 0.24592 | 0.31387  |
| H210 | 7.81044 | 0.18266 | 0.31815  |
| H211 | 7.87189 | 0.25537 | -0.34049 |
| H212 | 7.85596 | 0.31888 | -0.34665 |
| H213 | 7.88709 | 0.44702 | -0.25992 |
| H214 | 7.87649 | 0.51185 | -0.24686 |
| H215 | 7.80783 | 0.43957 | 0.37414  |
| H216 | 7.82041 | 0.37446 | 0.37244  |
| H217 | 7.70311 | 0.38299 | -0.45146 |
| H218 | 7.70639 | 0.29917 | 0.36498  |
| H219 | 7.77524 | 0.29149 | 0.39725  |
| H220 | 7.77095 | 0.37255 | -0.42751 |
| H221 | 7.4005  | 0.04406 | 0.20299  |
| H222 | 7.3844  | 0.10758 | 0.19827  |
| H223 | 7.26574 | 0.07903 | -0.41284 |
| H224 | 7.27939 | 0.01371 | -0.39278 |



|      |         |         |          |
|------|---------|---------|----------|
| H225 | 7.00219 | 0.27617 | 0.33577  |
| H226 | 7.06555 | 0.25977 | 0.34176  |
| H227 | 7.10783 | 0.38721 | -0.14347 |
| H228 | 7.04518 | 0.40455 | -0.14061 |
| H229 | 7.48774 | 0.76868 | -0.0364  |
| H230 | 7.55269 | 0.75722 | -0.05198 |
| H231 | 7.61717 | 0.88939 | -0.084   |
| H232 | 7.55207 | 0.90099 | -0.06947 |
| H233 | 7.27861 | 0.62661 | 0.00084  |
| H234 | 7.29204 | 0.56235 | -0.0149  |
| H235 | 7.42571 | 0.62647 | 0.08415  |
| H236 | 7.41238 | 0.69016 | 0.10843  |
| H237 | 7.2042  | 0.91582 | 0.12565  |
| H238 | 7.14126 | 0.92813 | 0.16092  |
| H239 | 7.06456 | 0.80947 | -0.04085 |
| H240 | 7.12775 | 0.79555 | -0.05951 |
| H241 | 7.36702 | 0.31971 | -0.32565 |
| H242 | 7.43584 | 0.31343 | -0.32525 |
| H243 | 7.50217 | 0.38701 | 0.27204  |
| H244 | 7.43403 | 0.3914  | 0.28982  |
| H245 | 7.25974 | 0.25981 | -0.22571 |
| H246 | 7.26565 | 0.19167 | -0.21843 |
| H247 | 7.38778 | 0.21049 | 0.37597  |
| H248 | 7.3813  | 0.27928 | 0.37085  |
| H249 | 7.3871  | 0.43614 | -0.27251 |
| H250 | 7.38138 | 0.50416 | -0.26239 |
| H251 | 7.30989 | 0.43832 | 0.34564  |
| H252 | 7.31812 | 0.37006 | 0.35557  |
| H253 | 7.2038  | 0.38267 | -0.38362 |

|      |         |         |          |
|------|---------|---------|----------|
| H254 | 7.19923 | 0.27819 | 0.34609  |
| H255 | 7.26651 | 0.2704  | 0.34381  |
| H256 | 7.27296 | 0.37587 | -0.37422 |
| H257 | 7.36984 | 0.82191 | -0.35493 |
| H258 | 7.43507 | 0.80938 | -0.35559 |
| H259 | 7.50749 | 0.87805 | 0.26773  |
| H260 | 7.44248 | 0.88861 | 0.27969  |
| H261 | 7.28612 | 0.77739 | -0.38427 |
| H262 | 7.29359 | 0.70861 | -0.35444 |
| H263 | 7.37788 | 0.70512 | 0.46284  |
| H264 | 7.36776 | 0.77292 | 0.44116  |
| H265 | 7.39381 | 0.90389 | 0.38295  |
| H266 | 7.3872  | 0.97288 | 0.34649  |
| H267 | 7.31456 | 0.98132 | -0.50612 |
| H268 | 7.32102 | 0.91157 | -0.46256 |
| H269 | 7.25171 | 0.87457 | 0.35817  |
| H270 | 7.17793 | 0.81378 | -0.30512 |
| H271 | 7.24089 | 0.79819 | -0.3017  |
| H272 | 7.3148  | 0.85788 | 0.36386  |

## Section K. Supporting references

- S1. Z. Y. Sun, Y. X. Li, L. Chen, X. B. Jing and Z. G. Xie, *Cryst. Growth Des.*, 2015, **15**, 542–545.
- S2. W. J. Luo, Y. X. Zhu, J. Y. Zhang, J. J. He, Z. G. Chi, P. W. Miller, L. P. Chen and C. Y. Sua, *Chem. Commun.* 2014, **50**, 11942–11945.
- S3. J. Lu and J. Zhang, *J. Mater. Chem. A*, 2014, **2**, 13831–13834.
- S4. S. Sahoo, D. Sharma, R. Bera, G. Crisponic and J. Callan, *Chem. Soc. Rev.*, 2012, **41**, 7195–7227.
- S5. W. Che, G. Li, X. Liu, K. Shao, D. Zhu, Z. Su and M. Bryce, *Chem. Commun.*, 2018, **54**, 1730–1733.
